# Supplementary material for: Magnoliae Cortex Alleviates Muscle Wasting by Modulating M2 Macrophages in a Cisplatin-Induced Sarcopenia Mouse Model
Source: PubMed Central journal article supplement (PMC8003985; doi:10.3390/ijms22063188), 2021-03-20
Supplement: ijms-22-03188-s001.pdf [file ijms-22-03188-s001.pdf]

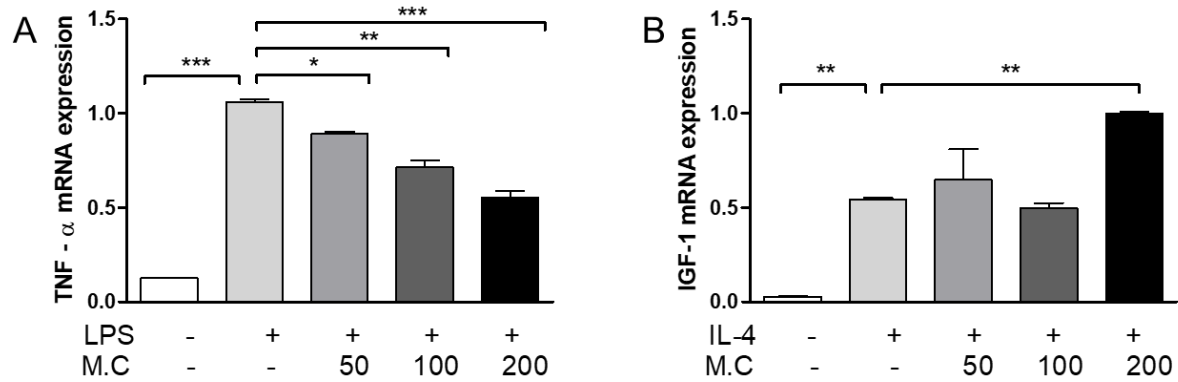

**Supplementary Figure S1. Production of cytokines by RAW 264.7 macrophage cells.** (A) RAW 264.7 cells were treated with LPS and M.C (0, 50, 100, 200  $\mu$ g/ml) and incubated for 3 days; (B) RAW 264.7 cell were treated by IL-4 and M.C (0, 50, 100, 200  $\mu$ g/ml) and incubated for 3 days. Cytokines mRNA were measured by using RT-qPCR. Data are presented as the mean  $\pm$  SEM (n = 4/group). \*  $p < 0.05$ , \*\*  $p < 0.01$ , \*\*\*  $p < 0.001$ , using Bonferroni post hoc test after one-way ANOVA.

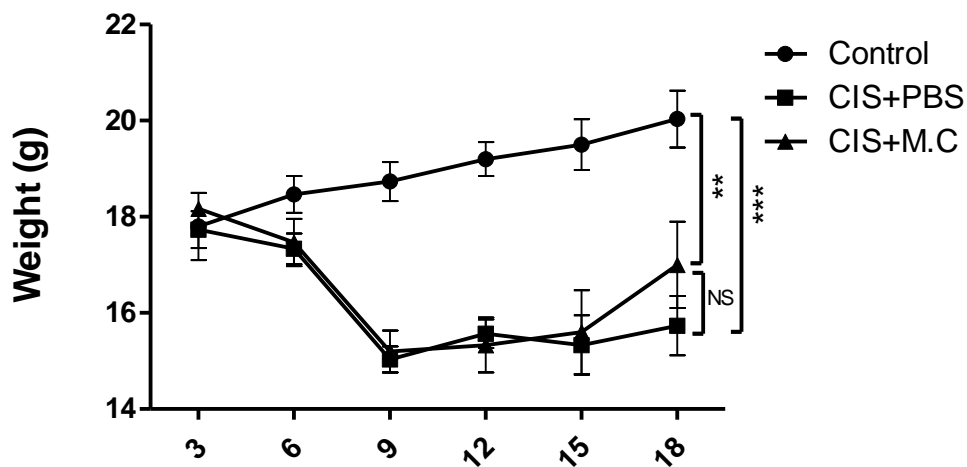

**Supplementary Figure S2. Weight change after cisplatin and M.C treatment in colon cancer-bearing mice.** CT26 tumor cells were injected subcutaneously into mice, and after 5 consecutive days, cisplatin (2.5 mg/kg, I.P) was injected, and they were treated with M.C (200 mg/kg, P.O) every 3 days, for a total of 6 times. Mice were sacrificed on day 18. Mice were measured every 3 days. Data are presented as the mean  $\pm$  SEM (n = 5). \*  $p < 0.05$ , \*\*  $p < 0.01$ , \*\*\*  $p < 0.001$  vs. control, using a two-way ANOVA.
